# Supplementary material
Source: PubMed Central journal article supplement (PMC2808361)
Supplement: emboj2009307s4.pdf [file emboj2009307s4.pdf]

# Supplementary Figure 4

A

|                  | <i>TetO7-RIO1</i> |      | <i>TetO7-RIO1 RPL25-TAP</i> |      | <i>TetO7-RIO1 RPL24A-TAP</i> |      | <i>TetO7-RIO1 PAB1-TAP</i> |      |
|------------------|-------------------|------|-----------------------------|------|------------------------------|------|----------------------------|------|
|                  | -DOX              | +DOX | -DOX                        | +DOX | -DOX                         | +DOX | -DOX                       | +DOX |
| <b>20S</b>       | 0.1               | Bg   | 1.6                         | 1.4  | 0.7                          | 0.9  | 0.9                        | 0.9  |
| <b>25S</b>       | 0.1               | Bg   | 2.2                         | 2.9  | 0.8                          | 1.0  | 1.0                        | 0.9  |
| <b>18S</b>       | 0.1               | Bg   | 1.8                         | 1.8  | 0.8                          | 1.0  | 1.0                        | 0.9  |
| <b>ACT1 mRNA</b> | Bg                | Bg   | 1.5                         | 1.8  | 0.7                          | 0.7  | 2.1                        | 2.3  |
| <b>U2</b>        | Bg                | Bg   | 0.1                         | 0.1  | 0.1                          | 0.1  | Bg                         | Bg   |
| <b>23S</b>       | Bg                | Bg   | Bg                          | Bg   | Bg                           | Bg   | Bg                         | Bg   |

B

|            | <b>Tif11-TAP</b> | <b>Prt1-TAP</b> | <b>Rpg1-TAP</b> | <b>Rli1-TAP</b> | <b>No TAP</b> |
|------------|------------------|-----------------|-----------------|-----------------|---------------|
| <b>20S</b> | 0.3              | 0.6             | 0.5             | 0.2             | Bg            |
| <b>25S</b> | 0.1              | 0.4             | 0.2             | 0.2             | Bg            |
| <b>18S</b> | 0.2              | 1.4             | 1.2             | 0.4             | 0.1           |
| <b>35S</b> | Bg               | Bg              | Bg              | Bg              | Bg            |
| <b>27S</b> | Bg               | Bg              | Bg              | Bg              | Bg            |
