# Supplementary material
Source: PubMed Central journal article supplement (PMC2808361)

# Supplementary Figure 1

A

*TetO7-RIO1*

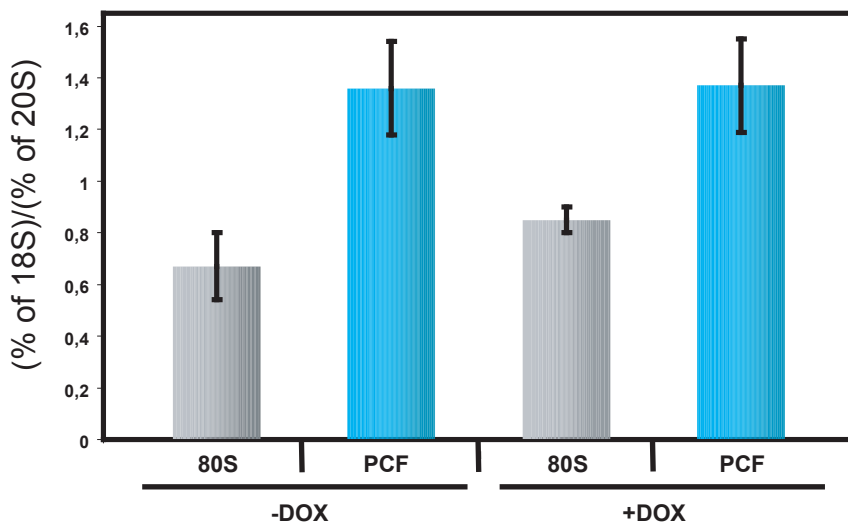

B

*Gal-HA-NOB1*

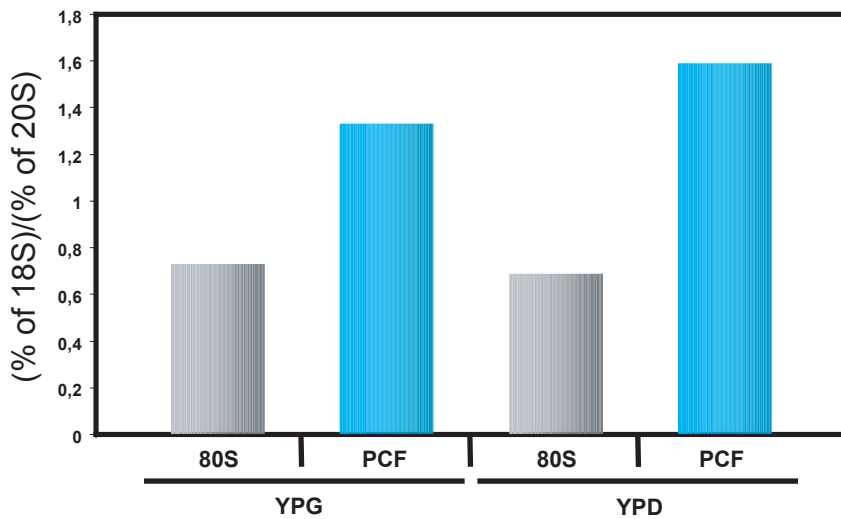

Supplement: emboj2009307s1.pdf [file emboj2009307s1.pdf]

# Supplementary Figure 2

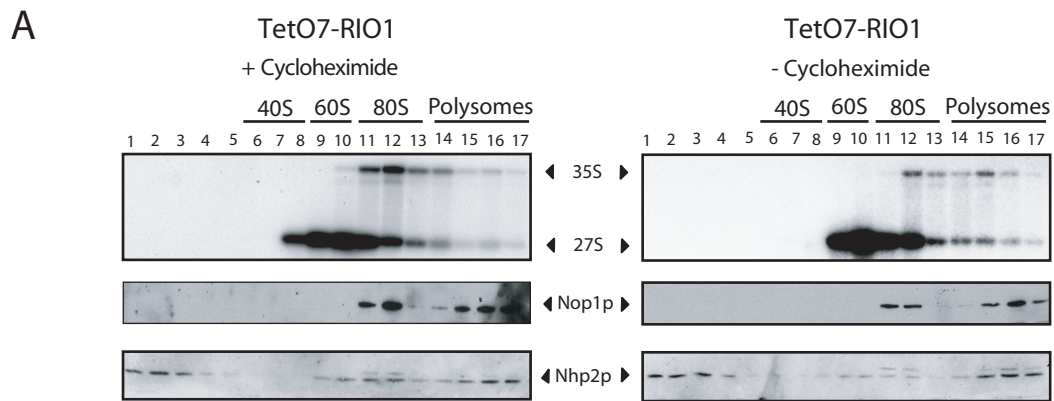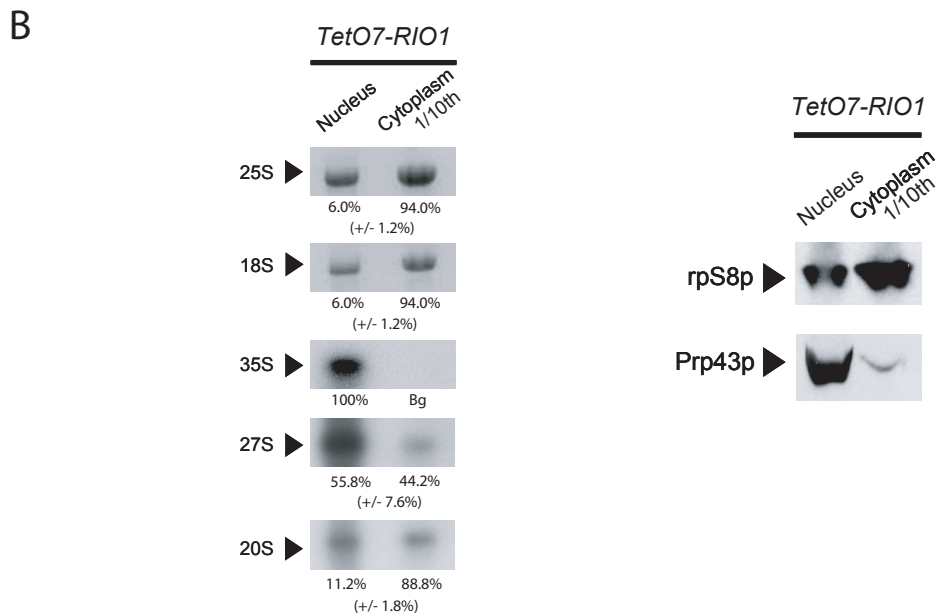

Supplement: emboj2009307s2.pdf [file emboj2009307s2.pdf]

# Supplementary Figure 3

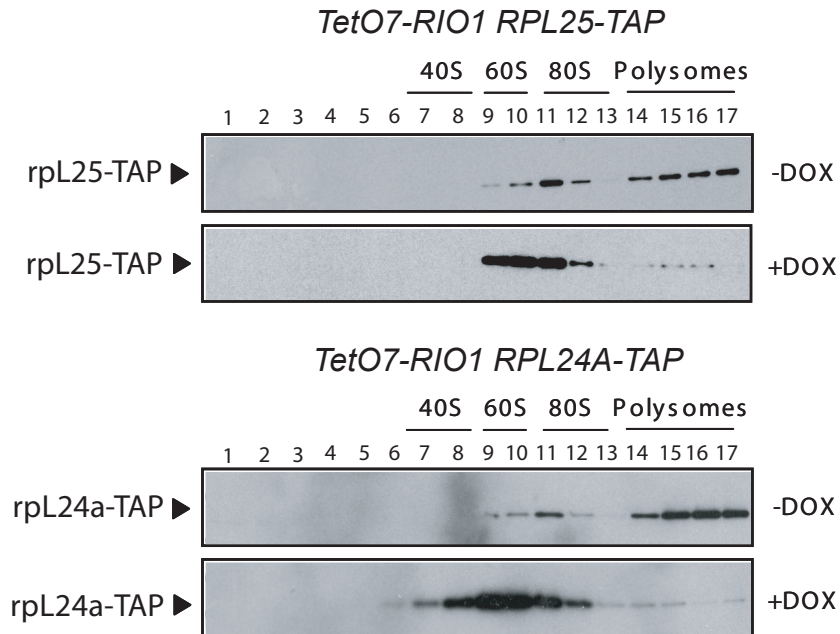

Supplement: emboj2009307s3.pdf [file emboj2009307s3.pdf]

# Supplementary Figure 5

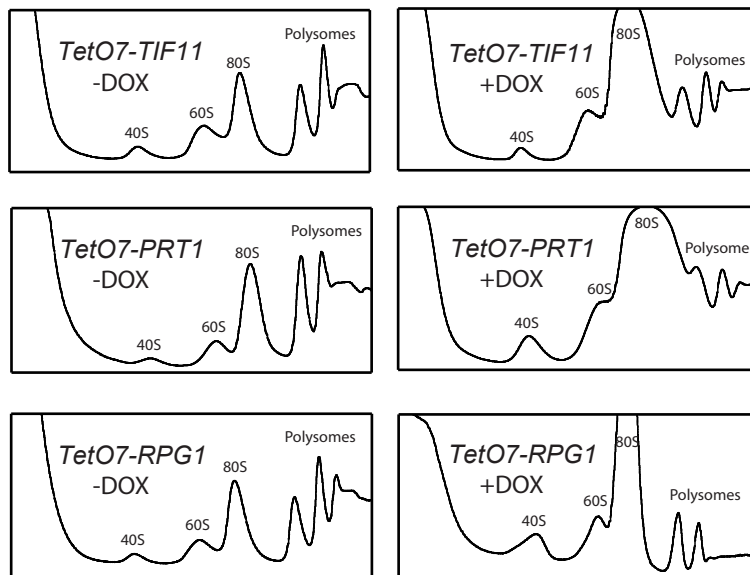

Supplement: emboj2009307s5.pdf [file emboj2009307s5.pdf]

# Supplementary Figure 6

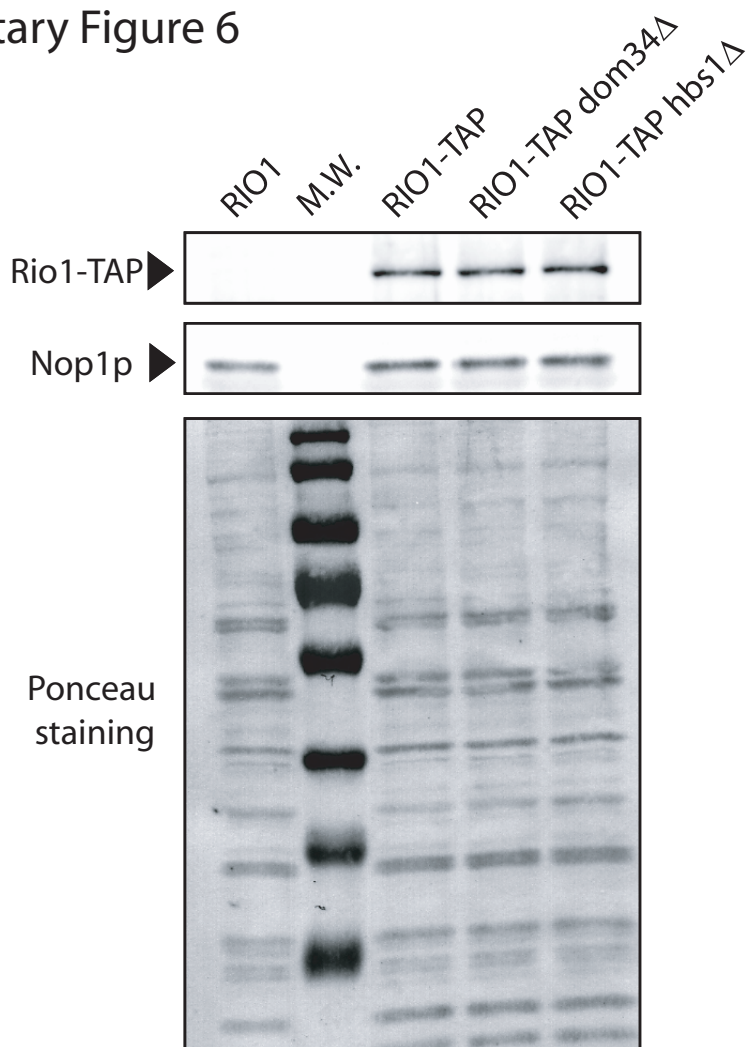

Supplement: emboj2009307s6.pdf [file emboj2009307s6.pdf]
